# Supplementary material for: Brown Seaweed Food Supplementation: Effects on Allergy and Inflammation and Its Consequences
Source: MDPI journal article supplement (doi:10.3390/nu13082613), 2021-07-29
Supplement: s1 [file s1]

## SUPPLEMENTARY MATERIAL

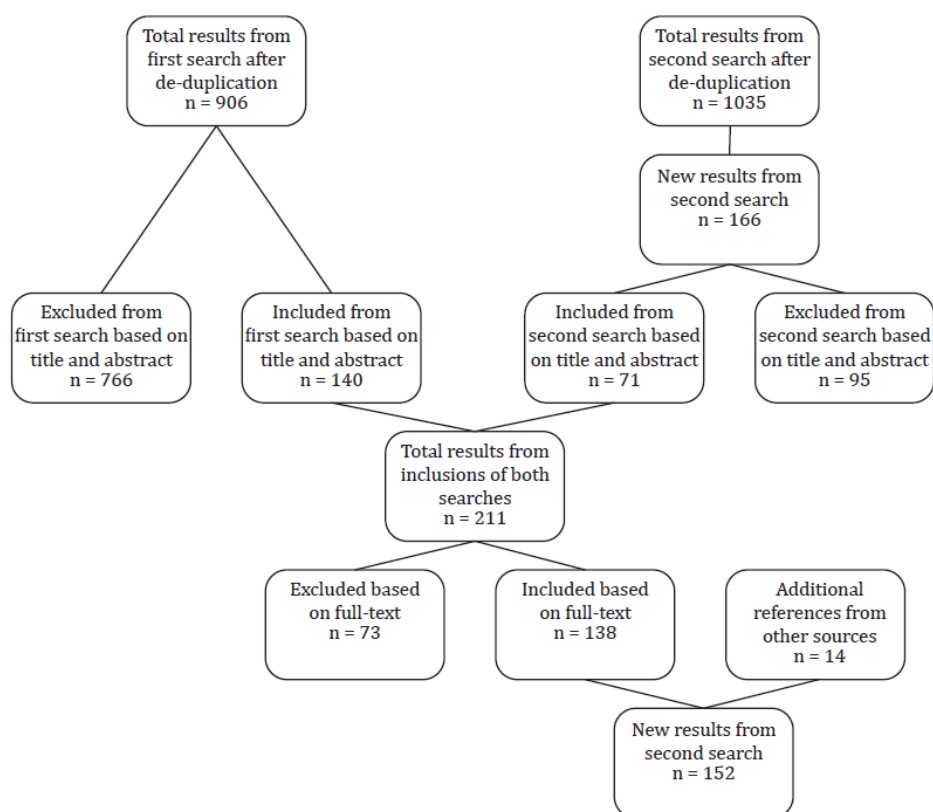

Supplementary figure S1: Flowchart of systematic search.

### Search terms

#### Embase

('brown alga'/exp OR 'Himanthalia elongata extract'/de OR 'fucoidin'/de OR 'fucoxanthin'/de OR 'fucosterol'/de OR 'phloroglucinol'/de OR (phloroglucin\* OR ascophyllum\* OR ecklonia\* OR laminaria\* OR macrocystis\* OR sargassum\* OR undaria\* OR saringosterol\* OR fucosterin\* OR fucosterol\* OR fucoxanthin\* OR fucoidin\* OR fucoidan\* OR himanthal\* OR phaeophyt\* OR phaeophyc\* OR fucophycean\* OR fucophyceae\* OR oligomannate\* OR phloroglucinol\* OR phlorotannin\* OR alaria-esculenta OR ((brown\*) NEAR/3 (alga OR algae OR macroalga OR macroalgae)):ab,ti) AND ('allergy'/exp OR 'allergen'/exp OR 'leukocyte'/exp OR 'microglia'/de OR 'macrophage'/exp OR 'antigen presenting cell'/exp OR (allerg\* OR atop\* OR interdigitat\*-cell\* OR ((Langerhans OR antigen-present\*) NEAR/3 (cell\*)) OR histiocyte\* OR kupffer\* OR microglia\* OR macrophage\* OR dendritic-cell\* OR mononuclear-cell\* OR giant-cell\* OR foam-cell\* OR osteoclast\* OR epithelioid-cell\* OR monocyte\* OR lymphocyte\* OR leukocyte\* OR leucocyte\* OR granulocyte\* OR basophil\* OR eosinophil\* OR neutrophil\* OR promyelocyte\* OR ((white\*) NEAR/3 (cell\*)):ab,ti) AND ('in vivo study'/exp OR 'follow up'/de OR 'nutraceutical'/de OR 'nutrition'/exp OR (in-vivo\* OR clinic\* OR case\* OR cohort\* OR longitud\* OR prospect\* OR retrospect\* OR follow-up OR trial OR nutraceutic\* OR nutriceutic\* OR edible\* OR diet\* OR food\* OR nutrition\* OR nutrient\* OR oral\*):ab,ti) NOT ([Conference Abstract]/lim)

### Medline

(exp Phaeophyta/ OR Phloroglucinol/ OR (phloroglucin\* OR ascophyllum\* OR ecklonia\* OR laminaria\* OR macrocystis\* OR sargassum\* OR undaria\* OR saringosterol\* OR fucosterin\* OR fucosterol\* OR fucoxanthin\* OR fucoidin\* OR fucoidan\* OR himanthal\* OR phaeophyt\* OR phaeophyc\* OR fucophycean\* OR fucophyceae\* OR oligomannate\* OR phloroglucinol\* OR phlorotannin\* OR alaria-esculenta OR ((brown\*) ADJ3 (alga OR algae OR macroalga OR macroalgae))).ab,ti.) AND (exp Allergens/ OR exp Leukocytes/ OR Microglia/ OR exp Macrophages/ OR exp Antigen-Presenting Cells/ OR (allerg\* OR atop\* OR interdigitat\*-cell\* OR ((Langerhans OR antigen-present\*) ADJ3 (cell\*)) OR histiocyte\* OR kupffer\* OR microglia\* OR macrophage\* OR dendritic-cell\* OR mononuclear-cell\* OR giant-cell\* OR foam-cell\* OR osteoclast\* OR epithelioid-cell\* OR monocyte\* OR lymphocyte\* OR leukocyte\* OR leucocyte\* OR granulocyte\* OR basophil\* OR eosinophil\* OR neutrophil\* OR promyelocyte\* OR ((white\*) ADJ3 (cell\*))).ab,ti.) AND (exp Cohort Studies/ OR exp Food/ OR exp Nutrition Therapy/ OR (in-vivo\* OR clinic\* OR case\* OR cohort\* OR longitud\* OR prospect\* OR retrospect\* OR follow-up OR trial OR nutraceutic\* OR nutriceutic\* OR edible\* OR diet\* OR food\* OR nutrition\* OR nutrient\* OR oral\*).ab,ti.) NOT (news OR congres\* OR abstract\* OR book\* OR chapter\* OR dissertation abstract\*).pt.

### Cochrane

((phloroglucin\* OR ascophyllum\* OR ecklonia\* OR laminaria\* OR macrocystis\* OR sargassum\* OR undaria\* OR saringosterol\* OR fucosterin\* OR fucosterol\* OR fucoxanthin\* OR fucoidin\* OR fucoidan\* OR himanthal\* OR phaeophyt\* OR phaeophyc\* OR fucophycean\* OR fucophyceae\* OR oligomannate\* OR phloroglucinol\* OR phlorotannin\* OR alaria-esculenta OR ((brown\*) NEAR/3 (alga OR algae OR macroalga OR macroalgae))).ab,ti) AND ((allerg\* OR atop\* OR (interdigitat\* NEXT/1 cell\*) OR ((Langerhans OR antigen-present\*) NEAR/3 (cell\*)) OR histiocyte\* OR kupffer\* OR microglia\* OR macrophage\* OR dendritic-cell\* OR mononuclear-cell\* OR giant-cell\* OR foam-cell\* OR osteoclast\* OR epithelioid-cell\* OR monocyte\* OR lymphocyte\* OR leukocyte\* OR leucocyte\* OR granulocyte\* OR basophil\* OR eosinophil\* OR neutrophil\* OR promyelocyte\* OR ((white\*) NEAR/3 (cell\*))).ab,ti) AND ((in-vivo\* OR clinic\* OR case\* OR cohort\* OR longitud\* OR prospect\* OR retrospect\* OR follow-up OR trial OR nutraceutic\* OR nutriceutic\* OR edible\* OR diet\* OR food\* OR nutrition\* OR nutrient\* OR oral\*);ab,ti)

### Web of Science

TS=(((phloroglucin\* OR ascophyllum\* OR ecklonia\* OR laminaria\* OR macrocystis\* OR sargassum\* OR undaria\* OR saringosterol\* OR fucosterin\* OR fucosterol\* OR fucoxanthin\* OR fucoidin\* OR fucoidan\* OR himanthal\* OR phaeophyt\* OR phaeophyc\* OR fucophycean\* OR fucophyceae\* OR oligomannate\* OR phloroglucinol\* OR phlorotannin\* OR alaria-esculenta OR ((brown\*) NEAR/2 (alga OR algae OR macroalga OR macroalgae)))) AND ((allerg\* OR atop\* OR (interdigitat\* NEAR/1 cell\*) OR ((Langerhans OR antigen-present\*) NEAR/2 (cell\*)) OR histiocyte\* OR kupffer\* OR microglia\* OR macrophage\* OR dendritic-cell\* OR mononuclear-cell\* OR giant-cell\* OR foam-cell\* OR osteoclast\* OR epithelioid-cell\* OR monocyte\* OR lymphocyte\* OR leukocyte\* OR leucocyte\* OR granulocyte\* OR basophil\* OR eosinophil\* OR neutrophil\* OR promyelocyte\* OR ((white\*) NEAR/2 (cell\*)))) AND ((in-vivo\* OR clinic\* OR case\* OR cohort\* OR longitud\* OR prospect\* OR retrospect\* OR follow-up OR trial OR nutraceutic\* OR nutriceutic\* OR edible\* OR diet\* OR food\* OR nutrition\* OR nutrient\* OR oral\*)) AND DT=(Article OR Review)

Google Scholar (top 100)

phaeophyte|phaeophycean|phaeophytes|phaeophyceans|"brown alga|algae"

allergy|atopic|leukocytes|lymphocytes|granulocytes|langerhans|microglia|macrophages|histiocytes|kupffer|"dendritic|giant|foam|white cells" nutraceutical|nutrition|food|diet

## **Glossary of Terms**

increased (compared to controls)

decreased (compared to controls)

= no change (compared to controls)

AA arachidonic acid

AAA abdominal aortic aneurysm

ACC acetyl-CoA carboxylase

AD Atopic dermatitis

ADRB3 beta-3 adrenergic receptor

AE aqueous extract

AF Apo-9'-fucoxanthinone

AGE advanced glycation end products

ALAT alanine aminotransferase

ALP alkaline phosphatase

ALT alanine aminotransferase

ALT alanine transaminase

ApoE apolipoprotein E

AST aspartate aminotransferase

AST aspartate transaminase

BAT brown adipose tissue

Ca calcium

CACC colitis associated colon cancer

CAP controlled attenuation parameters

CAT catalase

CCl4 carbon tetrachloride

CFA complete Freund's adjuvant

CNS central nervous system

conA concanavalin A

COX-2 cyclooxygenase 2

COX2 cyclooxygenase 2

CP cisplatin

CRP C-reactive protein

CY clycophosmamide

DNC 2,4-dinitrochlorobenzene

DNCB 2,4-dinitrochlorobenzene

DNP 2,4-dinitrophenol

DNP anti-dinitrophenyl

DSS dextran sodium sulfate

DSS dextran sulfate sodium

EAE experimental autoimmune encephalomyelitis

EH enzyme modified Sargassum fusiforme extracts

ER Endoplasmic Reticulum (ER)

ESR erythrocyte sedimentation rate

EtOH ethanol

F4/80 EGF-like module-containing mucin-like hormone receptor-like 1

Fc R Fc epsilon receptor

|               |                                                                                      |
|---------------|--------------------------------------------------------------------------------------|
| FD            | Fine dust                                                                            |
| Fx            | fucoxanthin                                                                          |
| FxOH          | fucoxanthinol                                                                        |
| GFS           | hot water extract with galactofucan sulfate                                          |
| GGT           | gamma glutamyl transferase                                                           |
| GLUT4         | glucose transporter type 4                                                           |
| GPx           | glutathione peroxidase                                                               |
| GSH           | glutathione                                                                          |
| HA            | hyaluronidase                                                                        |
| Hb            | hemoglobin                                                                           |
| Hc            | hematocrit                                                                           |
| HCD           | high cholesterol diet                                                                |
| HDL           | high-density lipoprotein                                                             |
| HFD           | high fat diet                                                                        |
| HMWF          | high-molecular-weight fucoidan                                                       |
| HOMA-IR       | homeostatic model assessment for insulin resistance                                  |
| HSFx          | high stability fucoxanthin                                                           |
| i.n.          | intranasal                                                                           |
| i.p.          | intraperitoneal                                                                      |
| ICAM-1        | intracellular adhesion molecule 1                                                    |
| ICR           | Institute of Cancer Research                                                         |
| IFA           | incomplete Freund's adjuvant                                                         |
| IFN- $\gamma$ | Interferon gamma                                                                     |
| Ig            | immunoglobulin                                                                       |
| iNOS          | inducible nitric oxide                                                               |
| KC            | keratinocyte chemoattractant                                                         |
| LBP           | lipopolysaccharide-binding protein                                                   |
| LD            | <i>Borrelia burgdorferi</i>                                                          |
| LDH           | lactate dehydrogenase                                                                |
| LDL           | low-density lipoprotein                                                              |
| LDL           | low-density lipoprotein                                                              |
| LFD           | low-fat diet                                                                         |
| LMF           | low-molecular-weight                                                                 |
| LMWF          | low-molecular-weight fucoidan                                                        |
| LOX           | lipoxigenase                                                                         |
| LPS           | lipopolysaccharide                                                                   |
| LXR           | liver X receptor                                                                     |
| M1            | pro-inflammatory macrophage (classically activated)                                  |
| M2            | anti-inflammatory macrophage (alternatively activated)                               |
| MAPK          | mitogen-activated protein kinase                                                     |
| MBP           | Myelin basic protein                                                                 |
| MCP-1         | monocyte chemotactic protein-1                                                       |
| MDA           | malondialdehyde                                                                      |
| mDC           | myeloid dendritic cell                                                               |
| MeOH          | methanol                                                                             |
| MES           | meroterpenoid-rich fraction of ethanolic extract from <i>Sargassum serratifolium</i> |
| MetS          | metabolic syndrome                                                                   |
| MIP-2         | macrophage inflammatory protein 2                                                    |
| MLN           | mesenteric lymph node                                                                |
| MMP-9         | matrix metalloproteinase 9                                                           |
| MMWF          | medium-molecular-weight fucoidan                                                     |

|                |                                                                      |
|----------------|----------------------------------------------------------------------|
| MPO            | myeloperoxidase                                                      |
| NAFLD          | nonalcoholic fatty liver disease                                     |
| NF- $\kappa$ B | nuclear factor- $\kappa$ B                                           |
| NH             | Sargassum fusiforme extracts                                         |
| NK             | natural killer cell                                                  |
| NO             | nitric oxide                                                         |
| OVA            | ovalbumin                                                            |
| OXA            | oxazolone                                                            |
| oxLDL          | oxidized low-density lipoprotein                                     |
| PCA            | passive cutaneous anaphylaxis                                        |
| PCON           | polycystic ovary syndrome                                            |
| PCOS           | polycystic ovary syndrome                                            |
| pDC            | plasmacytoid dendritic cell                                          |
| PFF            | phlorofucofuroeckol                                                  |
| PGC1 $\alpha$  | peroxisome proliferator-activated receptor gamma coactivator 1-alpha |
| PGE2           | prostaglandin E2                                                     |
| PHB            | 2,7-phloroglucinol-6,6'-bieckol                                      |
| PI-3K          | phosphatidyl inositol-3 kinase                                       |
| PLA2           | phospholipase A2                                                     |
| PM             | particulate matter                                                   |
| PMN            | polymorphonuclear leukocytes                                         |
| PON-1          | serum paraoxonase-1                                                  |
| PPAR           | peroxisome proliferator-activated receptor                           |
| PPB            | pyrogallol-phloroglucinol-6,6'-bieckol                               |
| PREC           | phlorotannin-rich extract of Ecklonia cava                           |
| QOL            | quality of life                                                      |
| RAGE           | receptor for advanced glycation end-products                         |
| RBC            | red blood cells                                                      |
| ROS            | reactive oxygen species                                              |
| SDF-1          | stromal cell-derived factor 1                                        |
| SIRT1          | sirtuin 1                                                            |
| SMCs           | smooth muscle cells?                                                 |
| SOCS-3         | suppressor of cytokine signaling 3                                   |
| SOD            | superoxide dismutase                                                 |
| TG             | triglyceride                                                         |
| TIMP-1         | tissue inhibitor of metalloproteinase 1                              |
| TPA            | 12-O-tetradecanoylphorbol-13-acetate                                 |
| UCP-1          | uncoupling protein 1                                                 |
| VCAM-1         | vascular cell adhesion molecule 1                                    |
| WAT            | white adipose tissue                                                 |
| WBC            | white blood cells                                                    |
| WL             | wakame lipids                                                        |
| WSSV           | White Spot Syndrome Virus                                            |
